# Supplementary material for: Anti-CSF-1 treatment is effective to prevent carcinoma invasion induced by monocyte-derived cells but scarcely by microglia
Source: PubMed Central journal article supplement (PMC4558165; doi:10.18632/oncotarget.3855), 2015-05-12
Supplement: oncotarget-06-15482-s001.pdf [file oncotarget-06-15482-s001.pdf]

## SUPPLEMENTARY FIGURES, TABLES LEGENDS

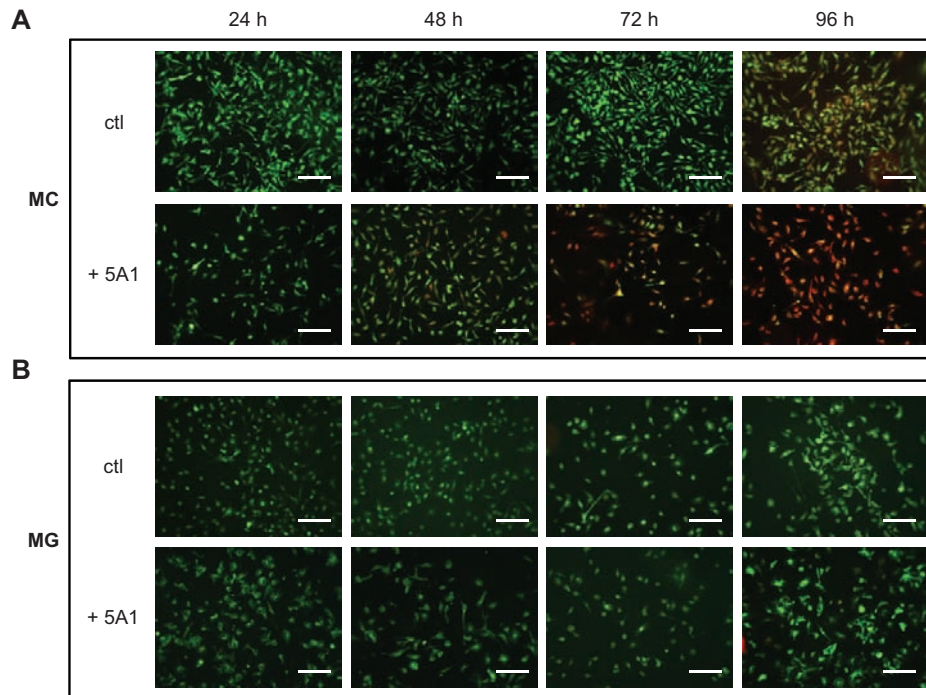

**Supplementary Figure S1: 5A1 induces apoptosis of MC but not MG.** MCs **A.** and MG **B.** were treated with 2,5  $\mu\text{g/ml}$  5A1 and calcein-AM / PI-staining was performed after 24 h, 48 h, 72 h and 96 h of incubation, respectively, for untreated (ctl) and treated (+5A1) cells. Scale bars indicate 0.1 mm. Experiments were performed in triplicates, shown is one representative result.

## Supplementary Table S1: Primer Sequences

| Gene     | fwd                   | rev                   |
|----------|-----------------------|-----------------------|
| hsCSF-1  | GGAGACCTCGTGCCAAATTA  | CGCATGGTGTCTCCATTAT   |
| hsCSF-1R | CGACTATAAGAACATCCACCT | CATTTGAAGAAGTGGAGACAG |
| hsGNB2L1 | AACCCTATCATCGTCTCCT   | CAATGTGGTTGGTCTTCAG   |
| hsHPRT1  | TATGCTGAGGATTTGGAAAGG | CATCTCCTTCATCACATCTCG |
| hsIL-34  | CCCATCCTGGAAGTACCT    | CATTCAAGAGGGACAACAC   |
| mmCsf-1  | GCGCTTTAAAGACAACACCC  | ATGGAAAGTTCGGACACAGG  |
| mmCsf-1r | CACCATCCAATTGTATGTC   | CTCAACCACTGTCACCTC    |
| mmGapdh  | CATCTTGGGCTACACTGAG   | CTGTAGCCGTATTTCATTGTC |
| mmIl-34  | TGGCTTTGGGAAACGAGAAT  | CCCTCATAAGGCACAGCAAT  |
| mmTbp    | TTCCCAGCTAAGTTCTTAGAC | CCAGGAAATAATTCTGGCTC  |
